# Supplementary material for: Investor Sentiment and Stock Market Volatility in South Africa
Source: Research Square preprint supplement (doi:10.21203/rs.3.rs-8823366/v1), 2026-02-23
Supplement: Supplementary file 1 [file c7657ddbc236334e8511b3df.docx]

**Appendix**

**Figure 1 Scree Plot for Sentiment Proxies PCA**

##
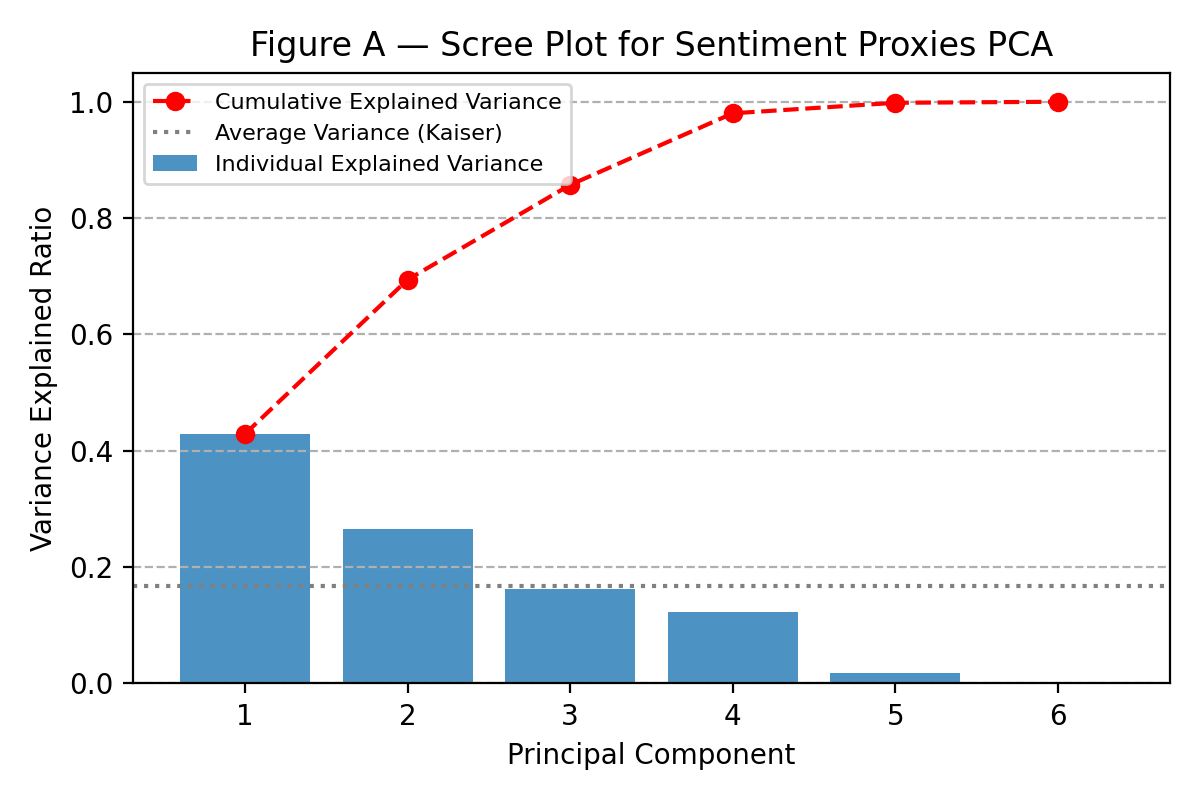


**Table 1A** **GARCH(1.1) Diagnostics**

| AIC | BIC | LogLik | N |
| --- | --- | --- | --- |
| 15583.2290 | 15617.1830 | -7786.6140 | 6574.0000 |

## **Table 2A EGARCH(1,1) Diagnostics**

| AIC | BIC | LogLik | N |
| --- | --- | --- | --- |
| 15417.349 | 15458.094 | -7702.674 | 6574.000 |

## **Table 3A GJR-GARCH(1,1) Diagnostics**

| AIC | BIC | LogLik | N |
| --- | --- | --- | --- |
| 15485.513 | 15526.259 | -7736.757 | 6574.000 |
